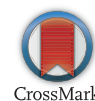

# What Should Be the Target Blood Pressure in Elderly Patients With Diabetes?

Anna Solini<sup>1</sup> and Ehud Grossman<sup>2,3</sup>

*Diabetes Care* 2016;39(Suppl. 2):S234–S243 | DOI: 10.2337/dcS15-3027

Hypertension is very common in elderly subjects with type 2 diabetes. The coexistence of hypertension and diabetes can be devastating to the cardiovascular system, and in these patients, tight blood pressure (BP) control is particularly beneficial. Little information is available regarding the target BP levels in elderly hypertensive patients with type 2 diabetes, and therefore extrapolation from data in the general population should be done. However, it is difficult to extrapolate from the general population to these frail individuals, who usually have isolated systolic hypertension, comorbidities, organ damage, cardiovascular disease, and renal failure and have a high rate of orthostatic and postprandial hypotension. On the basis of the available evidence, we provide arguments supporting the individualized approach in these patients. Target BP should be based on concomitant diseases, orthostatic BP changes, and the general condition of the patients. It is recommended to lower BP in the elderly patient with diabetes to <140–150/90 mmHg, providing the patient is in good condition. In patients with isolated systolic hypertension, the same target is reasonable providing the diastolic BP is >60 mmHg. In patients with coronary artery disease and in patients with orthostatic hypotension, excessive BP lowering should be avoided. In elderly hypertensive patients with diabetes, BP levels should be monitored closely in the sitting and the standing position, and the treatment should be tailored to prevent excessive fall in BP.

High blood pressure (BP) is a major risk factor for cardiovascular (CV) events. Linear relationships between CV morbidity and mortality risk and both systolic BP (SBP) and diastolic BP (DBP) levels starting from 115 and 75 mmHg, respectively, have been reported in the general population, independently of age, sex, ethnicity, and presence of comorbidities (1,2). A similar association either for micro- or for macrovascular complications has also been noted for patients with type 2 diabetes (3). The incidence of hypertension in patients with type 2 diabetes is approximately two-fold higher than in age-matched subjects without the disease (4), and data from the Framingham study show that the excess CV risk in type 2 diabetes is attributable to coexistent hypertension (5). Therefore, the definition of hypertension is more stringent in diabetes, and BP levels >130/80 mmHg are already defined as hypertension (6).

Life expectancy has increased over the years, and the world population is getting older. Hypertension is very common in elderly people (>60 years of age), reaching a prevalence of 60–80% in individuals in the U.S. (7). The rate of events in the elderly is high, and despite the fact that the association between BP levels and CV events is less steep in the elderly than in the young, the impact of elevated BP, in particular SBP, on CV morbidity and mortality in the elderly is significant (1,8). Therefore, BP control is also expected to provide benefits in aging individuals. A recent cost-effective analysis

<sup>1</sup>Department of Clinical and Experimental Medicine, University of Pisa, Pisa, Italy

<sup>2</sup>Hypertension Unit, Department of Internal Medicine D, Chaim Sheba Medical Center at Tel Hashomer, Tel Aviv, Israel

<sup>3</sup>Sackler Faculty of Medicine, Tel Aviv University, Tel Aviv, Israel

Corresponding author: Ehud Grossman, grosse@post.tau.ac.il.

This publication is based on the presentations at the 5th World Congress on Controversies to Consensus in Diabetes, Obesity and Hypertension (CODHy). The Congress and the publication of this supplement were made possible in part by unrestricted educational grants from AstraZeneca.

© 2016 by the American Diabetes Association. Readers may use this article as long as the work is properly cited, the use is educational and not for profit, and the work is not altered.

showed that implementation of the 2014 hypertension guidelines for U.S. adults between the ages of 35 and 74 years could potentially prevent ~56,000 CV events and 13,000 deaths annually while saving costs (9). However, how much BP should be lowered in aging individuals with type 2 diabetes is a controversial matter. The perfusion to vital organs, such as the brain and the heart, is dependent on BP levels, and elderly are more sensitive than young subjects to low BP values, making it extremely difficult to extrapolate targets and treatment criteria applied in the general population to these frail individuals, who are more likely to have associated diseases, organ damage, or clinical CV disease (10); orthostatic and postprandial hypotension; and chronic renal failure (10,11). They are also frequently characterized by isolated systolic hypertension with normal or low DBP, and their BP decreases less during nighttime (12). The frequent use of polypharmacy, with a high rate of side effects from antihypertensive drugs (8,13), makes the picture even more complicated. For all these reasons, treatment of elderly hypertensive patients with type 2 diabetes represents management dilemmas because most hypertension trials used upper age limits or did not present age-specific results.

In this article, we consider the theoretical advantages and disadvantages of aggressive BP lowering in these patients on the basis of the limited available evidence, also discussing the opportunity to define specific BP targets for them.

### Target BP in Elderly Patients With Diabetes According to Recently Published Guidelines

There are no clear guidelines as to what should be the target BP in elderly patients with diabetes. Most guidelines do not refer to target BP specifically in these patients; therefore, we reviewed the target BP recommended by the various guidelines for the general population, patients with diabetes, and elderly patients (Table 1). It is noteworthy that the recommendations, even mostly recommending less ambitious BP targets in individuals  $\geq 80$  years old, do not take into consideration specific problems such as previous stroke, coronary artery disease (CAD), chronic kidney disease (CKD), orthostatic or postprandial hypotension, recurrent falls, and/or cognitive

decline, which are common in the elderly and may change the target BP.

The British National Institute for Health and Care Excellence (NICE) recommended commencing antihypertension treatment for patients with diabetes with stage 1 hypertension (clinic BP  $>140/90$  mmHg) (14). In addition, the recently published 2015 American Diabetes Association (ADA) guidelines recommend that hypertensive patients with diabetes be treated if they have a DBP of  $>90$  mmHg or an SBP  $>140$  mmHg, with a target BP value of  $<140/90$  mmHg (15). The American Heart Association (AHA) and American College of Cardiology (ACC) recommend a target BP of  $<140/90$  mmHg but point out that lower targets may be considered (16). The American Society of Hypertension (ASH) and International Society of Hypertension (ISH) suggest a BP goal of  $<140/90$  mmHg in patients with diabetes (17). The panel members appointed to the Eighth Joint National Committee suggest a cutoff value of  $140/90$  mmHg for initiating antihypertension treatment in adult patients older than 18 years. These (i.e., BP values  $<140/90$  mmHg) are also the recommended treatment target values (18). The Canadian Hypertension Education Program (CHEP) guidelines recommend lowering BP to  $<130/80$  in patients with diabetes (19). The 2013 European Society of Hypertension and European Society of Cardiology recommend lowering SBP to  $<140$  mmHg and DBP to  $<85$  mmHg (20). The International Diabetes Federation suggests different BP targets according to age and recommends BP target values  $<130/80$  mmHg for patients with diabetes younger than 70 years, target values  $<140/90$  mmHg for patients 70–80 years old, and target values of  $<150/90$  mmHg for patients over 80 years old (21).

Most guidelines recommend a target BP  $<150/90$  mmHg in patients  $>80$  years old (Table 1). The ACC/AHA 2011 expert consensus document on hypertension in the elderly recommended for persons  $<80$  years of age a target BP of  $<140/90$  mmHg and for persons  $\geq 80$  years of age a target SBP of  $140$ – $145$  mmHg, if tolerated (10). The American Geriatrics Society and the ADA recommend a target BP  $<140/90$  mmHg (15,22).

For patients with CAD, the recent AHA/ACC/ASH scientific statement

recommended lowering BP to  $<140/90$  mmHg in those aged 65–79 years and to  $<150/80$  mmHg in those  $\geq 80$  years old (23). The different recommendations of the various societies indicate the lack of clarity regarding target BP in elderly patients with diabetes. To better clarify this issue, we summarized the literature dealing with target BP in patients with diabetes and elderly hypertensive patients.

### How Strong Is the Evidence for the Concept of “the Lower, the Better” in Patients With Diabetes?

Over the past decade, the dominating doctrine has stressed the need for target BP  $<130/80$  mmHg for patients with diabetes. This paradigm was based on several cornerstone studies. The UK Prospective Diabetes Study 36 (UKPDS 36) has documented an association between lower BP and improved outcome, showing that any reduction in SBP was associated with significant risk reductions for diabetes-related complications (12%), diabetes-related death (15%), myocardial infarction (11%), and microvascular complications (13%), with no threshold of risk for any end point and with SBP of  $<120$  mmHg having the lowest risk (3). The Hypertension Optimal Treatment (HOT) study displayed evidence that lowering BP to the lowest target level (DBP  $\leq 80$  mmHg) in hypertensive subjects with type 2 diabetes resulted in a 51% reduction of major CV events compared with the usual target group (DBP  $\leq 90$  mmHg) (24). Additionally, the UKPDS 38 study (25) showed that tight ( $<150/80$  mmHg) compared with modest ( $<180/105$  mmHg) BP control was associated with a reduction in diabetes-related death (32%), stroke (44%), and microvascular end points (37%). In Action in Diabetes and Vascular disease: PreterAx and Diamicon MR Controlled Evaluation (ADVANCE) (26), active treatment (BP  $136/73$  mmHg) reduced the relative risk of a major macrovascular or microvascular event by 9% compared with placebo (BP  $140/73$  mmHg).

Nevertheless, meticulous review of the literature and recently published data have cast doubt on the dominant doctrine supporting a more stringent BP treatment approach. In most of these studies, the initial baseline SBP levels were  $>160$  mmHg and probably even

higher, since most patients were already medically treated when recruited to participate in the studies. In these ranges, one would expect a significant risk reduction even for a relatively modest BP reduction. Furthermore, in almost all studies that showed the benefit of aggressive BP lowering in patients with type 2 diabetes, the achieved BP was  $>130/80$  mmHg (27). Additionally, recent publications did not support the concept that lower BP is indeed better. In the ONgoing Telmisartan Alone and in combination with Ramipril Global Endpoint Trial (ONTARGET) (28), despite the fact that combination therapy of telmisartan and ramipril reduced BP more than the ramipril-only regimen, the rate of primary end points was the same in both treatment arms. In a subgroup analysis of the International Verapamil SR/Trandolapril Study (INVEST-DM), performed in patients with type 2 diabetes and with CAD, there was no difference in short-term outcome between lowering SBP  $<130$  mmHg or  $<140$  mmHg, and in the long-term a more tight BP control was even associated with an increase in all-cause mortality (29). The Action to Control Cardiovascular Risk in Diabetes (ACCORD) BP trial has shown that intensive lowering of SBP ( $<120$  mmHg) in hypertensive patients with diabetes did not improve the overall outcome of CV events or deaths, except for a modest reduction in the risk for stroke (30). Yet, it increased serious adverse events from 1.3 to 3.3%, including syncope and hyperkalemia that can be attributed to antihypertension treatment (30). More recently, Prevention

Regimen for Effectively Avoiding Second Strokes (PROFESS), which included 5,743 patients with diabetes, demonstrated no difference in stroke recurrence, despite a BP lowering difference of  $3.8/2.0$  mmHg with telmisartan (31). In Telmisartan Randomized Assessment Study in ACE Intolerant subjects with cardiovascular Disease (TRANSCEND) (32), a placebo-controlled study that included 2,118 (35.8%) patients with diabetes, mean BP was lower in the telmisartan arm by  $4.0/2.2$  mmHg, but the rate of the primary end point (composite CV death, myocardial infarction, stroke, or hospitalization due to heart failure) was similar in both groups.

In the last 5 years, several meta-analyses have been published regarding BP-lowering target values among hypertensive patients with type 2 diabetes (Table 2). A meta-analysis of 13 randomized control studies including  $>37,000$  hypertensive patients with diabetes has showed that intensive SBP control ( $<130$  mmHg) was associated with a 10% reduction in all-cause mortality, yet no effects on microvascular or macrovascular events were noted. Regarding stroke, such intensive BP reduction led to a 17% risk reduction, accompanied by an additional risk reduction with further lowering of SBP to  $<120$  mmHg, without an increased risk for adverse effects (33). Another meta-analysis, comprised of 31 randomized control studies including  $>73,000$  hypertensive patients with diabetes, showed that more intensive BP reduction led to a 31% reduction in relative risk of stroke, with a 13% reduction for every 5-mmHg

SBP or 2-mmHg DBP reduction; however, the risk of myocardial infarction was not significantly reduced with the more intensive BP control (34). McBrien et al. (35) analyzed five large randomized control studies including 7,800 hypertensive patients with diabetes and demonstrated that intensive BP control ( $<130/80$  mmHg) did not improve the risk of mortality or myocardial infarction compared with the standard BP treatment goal ( $<140/160/85$ – $100$  mmHg). It did, however, significantly decrease the risk of stroke with a relative risk of 0.65, but with only a small, albeit significant, absolute risk difference of 0.01. The accumulating literature suggests that intensive BP lowering in subjects with diabetes reduces the risk of stroke but does not improve the overall outcome of CV events or deaths.

#### Does the Notion “the Lower, the Better” Hold in the Elderly?

The Framingham data suggested an age-dependent and sex-dependent threshold for hypertension (36). The suggested SBP threshold is  $\sim 140$  mmHg in men aged 45–54 years and 160 mmHg in those between 65 and 74 years; on this basis, even with the lack of epidemiological observations precisely addressing this issue, we may hypothesize that the threshold for men over 75 years old is even higher. This concept seems to be supported by some observational studies: Jacobs et al. (37) showed that elevated SBP was not associated with increased 5-year mortality in a cohort of community-dwelling 85-year-old individuals. Two other observational studies conducted in elderly

**Table 1—Recommended BP target (mmHg) in elderly patients and patients with diabetes according to different guidelines**

| Guidelines                         | General   | Diabetes                                                                            | Elderly                                                 |
|------------------------------------|-----------|-------------------------------------------------------------------------------------|---------------------------------------------------------|
| NICE, 2011 (14)                    | 140/90    | 140/90                                                                              | Age $\geq 80$ years, $<150/90$                          |
| ASH/ISH, 2014 (17)                 | 140/90    | $<140/90$                                                                           | AGE $\geq 80$ years, $<150/90$                          |
| ACC/AHA, 2014 (16)                 | $<140/90$ | $<140/90$                                                                           | Age $\geq 80$ years, $<150/90$                          |
| ESH/ESC, 2013 (20)                 | $<140/90$ | $<140/85$                                                                           | Age $\geq 80$ years, $<150/90$ SBP $<140$ if healthy    |
| AGS, 2013 (22)                     |           | $<140/90$ ; SBP $<120$ has potential harm                                           |                                                         |
| JNC 8, 2014 (18)                   | 140/90    | $<140/90$                                                                           | Age $\geq 60$ years, $<150/90$                          |
| CHEP, 2013 (19)                    | 140/90    | $<130/80$                                                                           | Age $\geq 80$ years, $<150/NA$                          |
| VA/DoD, 2015 (23)                  | $<150/90$ | $<150/85$ SBP $<140$ if tolerated                                                   | Age $\geq 60$ years, $<150/90$                          |
| ADA, 2015 (15)                     |           | $<140/90$ ; $<130/80$ may be appropriate if achieved without undue treatment burden |                                                         |
| IDF, 2014 (21)                     |           | $<130/80$                                                                           | Age 70–80 years, $<140/90$ ; $\geq 80$ years, $<150/90$ |
| ACC/AHA, 2011, in the elderly (10) |           | Age $<80$ years, $<140/90$ ; $\geq 80$ years, SBP 140–145                           |                                                         |

AGS, American Geriatrics Society; ESH/ESC, European Society of Hypertension/European Society of Cardiology; IDF, International Diabetes Federation; JNC 8, Eighth Joint National Committee; NA, not available; VA/DoD, Veterans Administration/Department of Defense.

**Table 2—List of some major meta-analyses that analyzed different target BP levels and outcomes**

| First author/study (ref. no.)                                                 | Number of patients                     | Conclusions                                                                                                                                                                                                                                                                                              |
|-------------------------------------------------------------------------------|----------------------------------------|----------------------------------------------------------------------------------------------------------------------------------------------------------------------------------------------------------------------------------------------------------------------------------------------------------|
| Bangalore (33)                                                                | >37,000 with diabetes                  | Intensive SBP control (<130 mmHg) is associated with a 10% reduction in all-cause mortality and 17% reduction in stroke, without effects on micro- or macrovascular events. An additional risk reduction in stroke with further lowering SBP to <120 mmHg, without an increased risk for adverse effects |
| Reboldi (34)                                                                  | 73,000 hypertensive with diabetes      | Intensive BP reduction is associated with a 31% reduction in relative risk of stroke, with a 13% reduction for every 5-mmHg SBP or 2-mmHg DBP reduction. The risk of myocardial infarction is not significantly reduced with more intensive BP control                                                   |
| McBrien (35)                                                                  | 7,800 hypertensive with diabetes       | Intensive BP control (<130/80 mmHg) does not improve the risk of mortality or myocardial infarction compared with the standard BP treatment goal (<140–160/85–100 mmHg). It decreased significantly the risk of stroke, with a relative risk of 0.65                                                     |
| INDANA (44)                                                                   | 1,670 elderly (>80 years) hypertensive | Antihypertension therapy led to a reduction in stroke (33%), CV morbidity (22%), and heart failure (39%), with no effect on coronary events                                                                                                                                                              |
| Blood Pressure Lowering Treatment Trialists' Collaboration meta-analysis (45) | 190,066                                | A similar benefit of lowering BP in young and elderly subjects                                                                                                                                                                                                                                           |
| Emdin (46)                                                                    | >100,000                               | No association between BP-lowering treatment and lower CV risk in subjects with baseline SBP ≤140 mmHg                                                                                                                                                                                                   |
| Xie (47)                                                                      | 44,989                                 | Intensive BP lowering (133/76 mmHg) provides greater vascular protection than standard regimens (BP of 140/81 mmHg). The main benefit of intensive BP lowering is observed in patients with diabetes and in those older than 62 years                                                                    |
| Arguedas (63)                                                                 | 7,314                                  | The only benefit of "lower" SBP (119.3/64.4 vs. 133.5/70.5 mmHg) is an absolute risk reduction of 1.1% in the incidence of stroke, with no effect on mortality and with the price of increased serious adverse events                                                                                    |

individuals with diabetes demonstrated an inverse relationship between mortality and BP levels (38,39). van Hateren et al. (39) showed that a decrease of 10 mmHg in SBP and DBP led to a mortality increase of 22 and 30%, respectively. These observational studies, however, may be misleading, since low BP in high-risk patients may be a marker of poor health rather than a cause of mortality. Data from prospective randomized trials are not consistent. Some suggest that lowering BP in the elderly is beneficial, but others fail to show any benefit from intensive BP control (Table 3).

The Hypertension in the Very Elderly Trial (HYVET) documented the benefits of lowering BP in persons ≥80 years of age: after 2 years of follow-up, mean BP was 15/6 mmHg lower in subjects receiving active treatment than in those receiving the placebo, and this difference led to a significant reduction in total mortality (21%), fatal stroke (39%), fatal and nonfatal stroke (30%), CV

disease (23%), and heart failure (64%) (40). A more recent reanalysis of HYVET showed no evidence of interaction between the beneficial effect of lowering BP and frailty (41). This reanalysis suggests that frail and healthy individuals gain the same benefit from lowering BP. However, it should be pointed out that in HYVET, only <7% of the study population had type 2 diabetes and that enrolled individuals were in good physical and mental condition, had low rate of previous CV disease, and did not have orthostatic hypotension and are therefore hardly representative of the typical very elderly. In subanalysis of ADVANCE by age, it was shown that lowering BP is safe and reduces the risk of major clinical outcomes in patients with diabetes of at least 75 years of age (8). The absolute benefits of BP-lowering therapy on major macrovascular events and death were even greater in older than in younger patients with diabetes (8) and were not offset by an

increased risk of side effects. Indeed, there were too few patients over the age of 80 years for meaningful analysis to be done. The Japanese Trial to Assess Optimal Systolic Blood Pressure in Elderly Hypertensive Patients (JATOS) included 4,418 elderly (65–85 years old) hypertensive Japanese patients, of whom only 11.8% had type 2 diabetes (42). This prospective, randomized, open-label study with blinded assessment of end points compared the 2-year effect of strict treatment to maintain SBP <140 mmHg with that of mild treatment to maintain SBP <160 but ≥140 mmHg. The study showed that reducing SBP <140 mmHg did not provide any further benefit over a SBP target <160 mmHg in terms of mortality and CV or renal events. A further subanalysis of the same cohort according to the average achieved BP levels documented a similar incidence of primary end points (43).

Given the scarce availability of specifically designed studies, some meta-analyses

**Table 3—List of the main prospective studies that evaluated different target BP levels in elderly hypertensive patients with diabetes**

| Trial acronym | Patients (N) | Age (years) | Follow-up (years)                                  | Achieved SBP (mmHg)                          |                    | Design                                                                                                                                                                                                                                                                                                                                                               | Primary end point                                                                                                                                                       | Secondary end points                                                                                                                                                                                                                                                                           |
|---------------|--------------|-------------|----------------------------------------------------|----------------------------------------------|--------------------|----------------------------------------------------------------------------------------------------------------------------------------------------------------------------------------------------------------------------------------------------------------------------------------------------------------------------------------------------------------------|-------------------------------------------------------------------------------------------------------------------------------------------------------------------------|------------------------------------------------------------------------------------------------------------------------------------------------------------------------------------------------------------------------------------------------------------------------------------------------|
|               |              |             |                                                    | Active                                       | Comparator         |                                                                                                                                                                                                                                                                                                                                                                      |                                                                                                                                                                         |                                                                                                                                                                                                                                                                                                |
| SHEP-DM       | 583          | 70          | 4.5                                                | 170                                          | 155                | Double-blind, randomized, placebo-controlled trial comparing chlorthalidone vs. placebo                                                                                                                                                                                                                                                                              | Decrease in CV disease 34%, $P < 0.05$                                                                                                                                  |                                                                                                                                                                                                                                                                                                |
| Syst-Eur-DM   | 492          | 70          | 2                                                  | 175                                          | 162                | Double-blind, randomized, placebo-controlled trial comparing nitrendipine vs. placebo                                                                                                                                                                                                                                                                                | Decrease in stroke 73%, $P = 0.02$                                                                                                                                      | Decrease in all CV end points 55%, $P = 0.09$<br>Decrease in CV mortality 76%, $P = 0.01$                                                                                                                                                                                                      |
| Syst-China-DM | 98           | 66.5        | 3                                                  | 172                                          | 156                | Double-blind, randomized, placebo-controlled trial comparing nitrendipine vs. placebo                                                                                                                                                                                                                                                                                | Decrease in stroke 45%, $P = 0.42$                                                                                                                                      | Decrease in all CV end points 74%, $P = 0.03$                                                                                                                                                                                                                                                  |
| ADVANCE       | 11,140       | 66          | 4.3                                                | 145                                          | 140                | Randomized controlled study comparing perindopril plus indapamide vs. placebo                                                                                                                                                                                                                                                                                        | Decrease in combined major macro- and microvascular events 9%, $P = 0.04$                                                                                               | Decrease in all-cause mortality 14%, $P = 0.03$ ; decrease in CV mortality 18%, $P = 0.03$ . Decrease in total coronary events 14%, $P = 0.02$ ; decrease in all renal events 21%, $P < 0.0001$ . No difference in total stroke, HF, visual deterioration, neuropathy, cognitive function      |
| HOT-DM        | 1,505        | 61.5        | 3.8                                                | 169                                          | 148                | PROBE design to determine target DBP. Felodipine as the first drug                                                                                                                                                                                                                                                                                                   | Decrease in CV end points 51%, $P = 0.005$                                                                                                                              |                                                                                                                                                                                                                                                                                                |
| INVEST-DM     | 6,400        | 66          | 2.7 (5 for all-cause mortality in the U.S. cohort) | Tight usual 144, usual 149, uncontrolled 159 | Uncontrolled 146.1 | Observational, secondary analysis of INVEST: a prospective, randomized double-blind trial that compared a CA-based with a $\beta$ -blocker-based treatment in hypertensive patients with CAD. Outcome was analyzed according to the level of BP control. Tight (SBP $< 130$ mmHg) vs. usual control (SBP 130 to $< 140$ mmHg) vs. uncontrolled (SBP $\geq 140$ mmHg) | Decrease in the first occurrence of composite of all-cause death, nonfatal MI, or nonfatal stroke in the usual control vs. uncontrolled blood pressure 32%, $P < 0.001$ | Decrease in all-cause mortality, nonfatal MI, nonfatal stroke, total MI, and total stroke in the usual and tight control vs. uncontrolled blood pressure ( $P < 0.05$ ). During extended follow-up, adjusted increase in all-cause mortality in the tight vs. usual control 15% ( $P = 0.04$ ) |
| ACCORD        | 4,733        | 62.2        | 4.7                                                | 139                                          | 133                | Prospective, randomized nonblinded trial assessing the benefit of intensive therapy (SBP $< 120$ mmHg) vs. standard therapy (SBP $< 140$ mmHg)                                                                                                                                                                                                                       | No difference in composite of nonfatal MI, nonfatal stroke, or death from CV causes, $P = 0.20$                                                                         | Decrease in rate of stroke 47% ( $P = 0.01$ ). No difference in other secondary end points                                                                                                                                                                                                     |

*Continued on p. S239*



Table 3—Continued

| Trial acronym | Patients (N)            | Age (years) | Follow-up (years) | Initial SBP (mmHg) | Achieved SBP (mmHg) |            | Design                                                                                                                                                                            | Primary end point                                                               | Secondary end points                                                                                                                                                                                                          |
|---------------|-------------------------|-------------|-------------------|--------------------|---------------------|------------|-----------------------------------------------------------------------------------------------------------------------------------------------------------------------------------|---------------------------------------------------------------------------------|-------------------------------------------------------------------------------------------------------------------------------------------------------------------------------------------------------------------------------|
|               |                         |             |                   |                    | Active              | Comparator |                                                                                                                                                                                   |                                                                                 |                                                                                                                                                                                                                               |
| JATOS         | 4,418<br>(521 had DM)   | 73.6        | 2                 | 171.6              | 135.9               | 145.6      | Randomized, open-label study with blinded assessment of end points evaluating the effect of strict antihypertensive treatment and mild treatment in elderly hypertensive patients | No difference in the rate of combined incidence of CV disease and renal failure | No difference between groups in the rate of total death ( $P = 0.22$ )                                                                                                                                                        |
| HYVET         | 3,845<br>(263 had DM)   | 83.6        | 1.8               | 173                | 143.5               | 158.5      | Randomized, double-blind, placebo-controlled study assessing the effect of indapamide vs. matching placebo in very elderly ( $>80$ years of age) subjects                         | A 30% decrease in the rate of fatal or nonfatal stroke, $P = 0.06$              | A 39% decrease in fatal stroke ( $P = 0.05$ ), 23% decrease in CV mortality ( $P = 0.06$ ), 21% decrease in all-cause mortality ( $P = 0.02$ ), 64% decrease in the rate of HF ( $P < 0.001$ )                                |
| FEVER         | 9,711<br>(1,241 had DM) | 61.5        | 3.3               | 154.2              | 137.3               | 142.5      | Randomized, double-blind, placebo-controlled study assessing the effect of low-dose felodipine vs. placebo                                                                        | A 28% decrease in the rate of fatal or nonfatal stroke, $P = 0.002$             | A 27% decrease in all CV events ( $P < 0.001$ ), 35% decrease in all cardiac events ( $P = 0.012$ ), 31% decrease in all-cause mortality ( $P = 0.006$ ), 32% decrease in coronary events ( $P = 0.024$ ), 30% decrease in HF |

CA, calcium antagonists; DM, diabetes mellitus; HF, heart failure; MI, myocardial infarction; PROBE, Prospective, Randomized, Open-Label, Blinded Endpoint Evaluation; Syst-China, Systolic Hypertension in China.

may offer further contribution to the knowledge (Table 2). The Individual Data Analysis of Antihypertensive intervention trials (INDANA), published in the late 1990s, showed in a small subset of individuals aged  $\geq 80$  years that antihypertension therapy led to a reduction in stroke (33%), CV morbidity (22%), and heart failure (39%), with no effect on coronary events (44). The Blood Pressure Lowering Treatment Trialists' Collaboration meta-analysis documented a similar benefit of lowering BP in young and elderly subjects (45).

A large meta-analysis evaluating  $>100,000$  participants, mostly aging between 65 and 75 years, failed to identify an association between BP-lowering treatment and lower CV risk in subjects with baseline SBP  $\leq 140$  mmHg (46). When trials were stratified by the SBP achieved in the treatment group ( $\geq 130$  or  $<130$  mmHg), significant interactions were observed for mortality, CAD, CV disease, heart failure, and albuminuria, with lower relative risk for patients with SBP  $\geq 130$  mmHg than for those with SBP  $\leq 130$  mmHg. A recent meta-analysis that included 44,989 participants showed that intensive BP lowering (133/76 mmHg) provided greater vascular protection than standard regimens (BP of 140/81 mmHg). The main benefit of intensive BP lowering was observed in patients with diabetes and in those older than 62 years (47).

The Systolic Blood Pressure Intervention Trial (SPRINT), which was recently published, randomized 9,361 persons with SBP  $>130$  mmHg and increased CV risk, but without type 2 diabetes, to an SBP target  $<120$  mmHg (intensive treatment) or  $<140$  mmHg (standard treatment) (48). The primary composite outcome was myocardial infarction, other acute coronary syndromes, stroke, heart failure, or death from CV causes. At 1 year, the mean SBP was 121.4 mmHg in the intensive treatment group and 136.2 mmHg in the standard treatment group. The study was stopped early after a median follow-up of 3.26 years owing to 25% lower rate of the primary composite outcome in the intensive treatment group than in the standard treatment group ( $P < 0.001$ ). All-cause mortality was also lower by 27% in the intensive treatment group ( $P = 0.003$ ). The main benefit was observed in elderly subjects ( $>75$  years), who constituted 28% of the study population. Rates of serious adverse events of

hypotension, syncope, electrolyte abnormalities, and acute kidney injury or failure, but not of injurious falls, were higher in the intensive treatment group than in the standard treatment group (48). This recent study supports intensive BP lowering in elderly patients without diabetes and with increased CV risk. The results of this study cannot be applied to elderly hypertensive patients with diabetes, but it is speculated that elderly with diabetes may also benefit from intensive BP lowering. Indeed, ACCORD failed to show any benefit from intensive BP lowering in patients with diabetes, but this study included fewer elderly subjects, since the mean age of the study group was 62.2 years, whereas in SPRINT the mean age was 67.9 years (30,48).

It is also noteworthy that in ACCORD, despite the failure to show a decrease in primary end points in the intensive treatment arm the rate of stroke was significantly lower in the intensive than in the usual treatment arm (30). In SPRINT, the rate of stroke was the same in the intensive and the standard treatment arms (48). It is possible that ACCORD was underpowered, with a much lower event rate than anticipated, and therefore the benefit of intensive BP lowering was not observed. Recently, new results from a long-term follow-up of the ACCORD patients (ACCORD Follow-on Study [ACCORDION]), were presented at the 2015 AHA meeting (49). In this extended study, 3,957 patients were followed for an additional 54–60 months. During this time, patients who had been in the intensive BP arm in the main trial were no longer aiming for the lower BP goals, so the difference in BP between the two groups narrowed from 14.5 mmHg at the end of the main trial to 4.2 mmHg at the end of the follow-up period. Results from the follow-up period showed a 9% nonsignificant reduction in the primary end point of major CV events over a median follow-up of 8.8 years from randomization. During the long-term follow-up, an interaction between BP and glycemia interventions became significant ( $P$  for interaction 0.037), with evidence of benefit for intensive BP lowering in participants randomized to standard glycemia therapy (hazard ratio 0.79 [95% CI 0.65–0.96]). These long-term results of ACCORD do take on enhanced importance when viewed alongside the SPRINT results.

Indeed, the evidence to treat patients with diabetes to a target of  $<120$  mmHg is weak, but we should keep in mind that in most previous trials the benefits of BP reduction in patients with diabetes were at least as good if not better than in individuals without diabetes. Taking into account results from the standard glycemic control arm of ACCORD, including those from long-term follow-up, and the stroke benefit seen in the main trial, together with the SPRINT results, it seems that elderly hypertensive patients with diabetes may benefit from intensive BP lowering if they can tolerate low BP levels.

### **The Approach to Elderly Patients With Diabetes With Isolated Systolic Hypertension**

Special attention should be paid to isolated systolic hypertension, defined as SBP  $>140$  mmHg and DBP  $<90$  mmHg. This entity is a reflection of increased arterial stiffness and is characterized by a tendency to pronounced salt retention, likely due to a combination of reduced renin-angiotensin activity and reduced  $\beta$ -1 sensitivity (50).

Isolated systolic hypertension is frequently observed in aging (approximately 25–30% in individuals  $>80$  years old), even though its prevalence, in untreated elderly individuals, seems to follow an encouraging, descending trend in the U.S. (12).

There is no clear indication of the ideal target SBP in these patients. The recently published REasons for Geographic And Racial Differences in Stroke (REGARDS) study, a large observational survey with  $\sim 30\%$  patients with type 2 diabetes, showed a linear association between higher SBP categories and all-cause mortality risk among participants aged 55–64 and 65–74 years, while in individuals  $\geq 75$  years old no association was present between SBP and all-cause mortality (51). In Systolic Hypertension in the Elderly Program (SHEP) (52) in elderly patients (age  $>60$  years) with isolated systolic hypertension, chlorthalidone reduced the rate of total stroke by 36%, the rate of major CV events by 32%, and the rate of all-cause mortality by 13%. The beneficial effects of chlorthalidone were the same in participants with and participants without diabetes, and no additional benefits were reported in terms of stroke reduction in

patients with achieved SBP  $<140$  vs.  $<150$  mmHg.

In the Systolic Hypertension in Europe (Syst-Eur) trial (53), which included 4,600 elderly participants, significant improvements in the incidence of stroke and fatal and nonfatal cardiac end points were obtained, apparently in the absence of a J-curve effect. However, mortality benefits decreased with increasing age (54). Subanalysis in 492 patients with diabetes showed that lowering BP is particularly beneficial in these patients. Active treatment lowered overall mortality by 55%, mortality from CV disease by 76%, all CV events combined by 69%, and fatal and nonfatal strokes by 73% (55). The Felodipine Event Reduction (FEVER) study showed a reduced risk of stroke (44%) in elderly patients in the intensively treated group, whose mean SBP was 138 mmHg (56). Patients with isolated systolic hypertension usually have low DBP, and consequently, lowering SBP will also lower DBP. Several studies have shown a J-curve association between DBP and CV events with a nadir between 60 and 70 mmHg (57,58). This may explain why some of the potential benefits of lowering SBP may be offset by the decrease in DBP. Therefore, it seems reasonable, in elderly patients with diabetes with isolated systolic hypertension, to recommend lowering SBP to levels ranging from 140 to 150 mmHg providing the DBP is  $>60$  mmHg. In patients with DBP of  $\leq 60$  mmHg, a target SBP of 160 mmHg may be adequate.

### **Target BP in Elderly Patients With CKD**

A certain decline in glomerular filtration rate with aging is considered physiologic, and the prevalence of CKD is high in elderly individuals with diabetes (59). SBP and DBP are among the strongest independent predictors of decline in renal function as well as albuminuria in the elderly (60). A general perception is that, in patients with type 2 diabetes and/or CKD, a lower target BP should be achieved, even though it has not been established whether lower targets will result in reduced morbidity or mortality or delay decline in renal function; in this view, there is no specific BP target for elderly hypertensive patients with diabetes and with CKD.

Kidney Disease Improving Global Outcomes (KDIGO) recommends a target BP  $\leq 140/90$  mmHg, with a lower target

(130/80 mmHg) in patients with type 2 diabetes and CKD and with a further lower target only in albuminuric ( $>30$  mg/g creatinine) individuals (61). These recommendations are based solely on observational studies and reflect opinions rather than compelling evidence (61). The rationale behind the recommendation to lower BP more intensively in patients with diabetes and with CKD is the increase risk of stroke in patients with CKD (62). Since intensive BP lowering in patients with diabetes is mainly beneficial in reducing the rate of stroke (33), it is speculated that these patients may benefit from intensive BP lowering. However, this speculation has not been supported by clinical studies. A recent Cochrane review (63), focusing on trials comparing people with diabetes randomized to lower ( $<130/85$  mmHg) or to standard (140–160/100 mmHg) BP targets, identified five studies that evaluated patients with CKD stage 3b or higher (estimated glomerular filtration rate  $<45$  mL/min/1.73 m<sup>2</sup>). The conclusion was that despite achievement of a significantly lower BP (119.3/64.4 vs. 133.5/70.5 mmHg), the only benefit of “lower” SBP was an absolute risk reduction of 1.1% in the incidence of stroke, but with no effect on mortality, and with the price of increased serious adverse events. For analysis of the effect of “lower” DBP, the authors found four trials that specifically compared clinical outcomes associated with “lower” (128/76 mmHg) versus “standard” targets (135/83 mmHg). Low target DBP did not reduce the rate of stroke, myocardial infarction, or congestive heart

failure, and the effects on end-stage renal failure and total serious adverse events were not reported in any of the trials. The authors of this meta-analysis concluded that there is no evidence to support BP targets that are lower than the standard targets in hypertensive patients with diabetes and with CKD. On this basis, a group of experts has recently discouraged applying low BP targets in patients with diabetes and CKD stage 3b or higher (64).

In summary, there is no specific BP target for elderly hypertensive patients with diabetes and with CKD. It seems that treatment of these patients should be tailored by careful consideration of age, comorbidities, and concomitant therapies with specific attention to adverse events related to BP treatment.

#### Target BP in Elderly Patients With Diabetes and CAD

Older hypertensive patients with already established vascular disease, especially with CAD, may be more vulnerable to low BP levels. The recent Second Manifestations of ARterial disease (SMART) trial included 5,788 patients, of whom 966 had diabetes, with symptomatic vascular disease. Patients were followed up for a median of 5 years for the occurrence of new vascular events. The nadir BP, where the event rate was lowest, was 143/82 mmHg. BP  $\geq 143/82$  mmHg was an independent risk factor for recurrent vascular events in aging patients (65). Messerli et al. (66) showed that in hypertensive patients with CAD, the risk for the primary outcome, all-cause death, and myocardial infarction progressively increased with

low DBP. These data suggest that excessive reduction in DBP should be avoided in patients with CAD who are being treated for hypertension. Subanalysis of INVEST by age showed that in hypertensive patients with CAD the nadir SBP, where the event rate was lowest, increased with increasing age and was 140 mmHg (67). Since many elderly patients with diabetes have CAD (even silent), aggressive lowering of BP in this population should be avoided.

#### Target BP in Elderly Patients With Diabetes With Orthostatic Hypotension

The presence of orthostatic hypotension, defined as a decrease  $>20$  mmHg in SBP or  $>10$  mmHg in DBP moving from a supine to a standing position, is a challenge in the treatment of elderly hypertensive individuals with diabetes. The presence of orthostatic hypotension, occurring in up to 30% of aging hypertensive individuals, and even more frequently in individuals with diabetes due to the neuropathic involvement (11), predisposes to CV events and may determine further complications, such as falls (68). Lowering BP in these patients may excessively decrease standing BP, leading to recurrent falls and hypoperfusion to vital organs. It is noteworthy that patients with orthostatic hypotension were excluded from HYVET; therefore, there are no outcome data on the benefit of lowering BP in these individuals. It seems that the potential long-term benefit of lowering BP is offset by the short-term side effects of falls; since there are no guidelines on how to treat these patients, we consider it reasonable not to lower BP in elderly patients with diabetes with orthostatic hypotension or recurrent falls.

#### Conclusion

Further clinical research is definitely needed in elderly individuals with diabetes to properly clarify what target BP should be. The available data suggest that lowering BP more aggressively may reduce the risk of stroke but with a price of increased cardiac events and side effects. Based on the limited available data and the main international guidelines, we suggest in elderly, but otherwise healthy, patients with diabetes a BP target of  $<140$ – $150/90$  mmHg. Lower BP levels may be adequate if tolerated by the

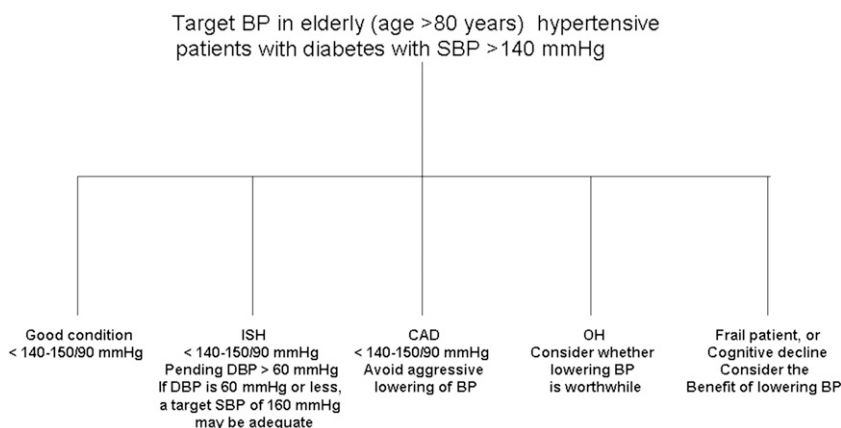

**Figure 1**—Individualized target BP in elderly hypertensive patients with diabetes. ISH, isolated systolic hypertension; OH, orthostatic hypotension.



patients. Since most of these patients, however, have concomitant diseases and many are very frail, a personalized BP target would be more appropriate, with adjustment of care plans periodically, trying to adequately manage the patient and minimize orthostatic hypotension and any drug-related complications and to maintain a reasonably good quality of life (Fig. 1). The presence of geriatric syndromes, including cognitive impairment, reduced vision and hearing, depression, and chronic pain, should also be considered, and in the light of the dangerous consequences of excessively low BP values, the patient's conditions regarding mobility, risk of falls, social support, and home safety need to be properly balanced.

**Duality of Interest.** E.G. is a consultant for Bayer, Pfizer, and Dixel. No other potential conflicts of interest relevant to this article were reported.

## References

- Lewington S, Clarke R, Qizilbash N, Peto R, Collins R; Prospective Studies Collaboration. Age-specific relevance of usual blood pressure to vascular mortality: a meta-analysis of individual data for one million adults in 61 prospective studies. *Lancet* 2002;360:1903–1913
- Rapsomaniki E, Timmis A, George J, et al. Blood pressure and incidence of twelve cardiovascular diseases: lifetime risks, healthy life-years lost, and age-specific associations in 1.25 million people. *Lancet* 2014;383:1899–1911
- Adler AI, Stratton IM, Neil HA, et al. Association of systolic blood pressure with macrovascular and microvascular complications of type 2 diabetes (UKPDS 36): prospective observational study. *BMJ* 2000;321:412–419
- Sowers JR. Recommendations for special populations: diabetes mellitus and the metabolic syndrome. *Am J Hypertens* 2003;16:415–455
- Chen G, McAlister FA, Walker RL, Hemmelgarn BR, Campbell NR. Cardiovascular outcomes in framingham participants with diabetes: the importance of blood pressure. *Hypertension* 2011;57:891–897
- Arauz-Pacheco C, Parrott MA, Raskin P. The treatment of hypertension in adult patients with diabetes. *Diabetes Care* 2002;25:134–147
- Egan BM, Zhao Y, Axon RN. US trends in prevalence, awareness, treatment, and control of hypertension, 1988–2008. *JAMA* 2010;303:2043–2050
- Ninomiya T, Zoungas S, Neal B, et al.; ADVANCE Collaborative Group. Efficacy and safety of routine blood pressure lowering in older patients with diabetes: results from the ADVANCE trial. *J Hypertens* 2010;28:1141–1149
- Moran AE, Odden MC, Thanataveerat A, et al. Cost-effectiveness of hypertension therapy according to 2014 guidelines. *N Engl J Med* 2015;372:447–455
- Aronow WS, Fleg JL, Pepine CJ, et al. ACCF/AHA 2011 expert consensus document on hypertension in the elderly: a report of the American College of Cardiology Foundation Task Force on Clinical Expert Consensus documents developed in collaboration with the American Academy of Neurology, American Geriatrics Society, American Society for Preventive Cardiology, American Society of Hypertension, American Society of Nephrology, Association of Black Cardiologists, and European Society of Hypertension. *J Am Coll Cardiol* 2011;57:2037–2114
- Weiss A, Grossman E, Beloosesky Y, Grinblat J. Orthostatic hypotension in acute geriatric ward: is it a consistent finding? *Arch Intern Med* 2002;162:2369–2374
- Liu X, Rodriguez CJ, Wang K. Prevalence and trends of isolated systolic hypertension among untreated adults in the United States. *J Am Soc Hypertens* 2015;9:197–205
- Sharabi Y, Illan R, Kamari Y, et al. Diuretic induced hyponatraemia in elderly hypertensive women. *J Hum Hypertens* 2002;16:631–635
- Krause T, Lovibond K, Caulfield M, McCormack T, Williams B; Guideline Development Group. Management of hypertension: summary of NICE guidance. *BMJ* 2011;343:d4891
- American Diabetes Association. Cardiovascular disease and risk management. Sec. 8. In *Standards of Medical Care in Diabetes—2015*. *Diabetes Care* 2015;38(Suppl. 1):S49–S57
- Go AS, Bauman MA, Coleman King SM, et al. An effective approach to high blood pressure control: a science advisory from the American Heart Association, the American College of Cardiology, and the Centers for Disease Control and Prevention. *J Am Coll Cardiol* 2014;63:1230–1238
- Weber MA, Schiffrin EL, White WB, et al. Clinical practice guidelines for the management of hypertension in the community: a statement by the American Society of Hypertension and the International Society of Hypertension. *J Clin Hypertens (Greenwich)* 2014;16:14–26
- James PA, Oparil S, Carter BL, et al. 2014 evidence-based guideline for the management of high blood pressure in adults: report from the panel members appointed to the Eighth Joint National Committee (JNC 8). *JAMA* 2014;311:507–520
- Houle SK, Padwal R, Tsuyuki RT. The 2012–2013 Canadian Hypertension Education Program (CHEP) guidelines for pharmacists: An update. *Can Pharm J (Ott)* 2013;146:146–150
- Mancia G, Fagard R, Narkiewicz K, et al.; Task Force Members. 2013 ESH/ESC Guidelines for the management of arterial hypertension: the Task Force for the management of arterial hypertension of the European Society of Hypertension (ESH) and of the European Society of Cardiology (ESC). *J Hypertens* 2013;31:1281–1357
- International Diabetes Federation Guideline Development Group. Global guideline for type 2 diabetes. *Diabetes Res Clin Pract* 2014;104:1–52
- Moreno G, Mangione CM, Kimbro L, Vaisberg E; American Geriatrics Society Expert Panel on Care of Older Adults with Diabetes Mellitus. Guidelines abstracted from the American Geriatrics Society Guidelines for Improving the Care of Older Adults with Diabetes Mellitus: 2013 update. *J Am Geriatr Soc* 2013;61:2020–2026
- Rosendorff C, Lackland DT, Allison M, et al.; American Heart Association, American College of Cardiology, and American Society of Hypertension. Treatment of hypertension in patients with coronary artery disease: a scientific statement from the American Heart Association, American College of Cardiology, and American Society of Hypertension. *Circulation* 2015;131:e435–e470
- Hansson L, Zanchetti A, Carruthers SG, et al.; HOT Study Group. Effects of intensive blood-pressure lowering and low-dose aspirin in patients with hypertension: principal results of the Hypertension Optimal Treatment (HOT) randomised trial. *Lancet* 1998;351:1755–1762
- UK Prospective Diabetes Study Group. Tight blood pressure control and risk of macrovascular and microvascular complications in type 2 diabetes: UKPDS 38. *BMJ* 1998;317:703–713
- Patel A, MacMahon S, Chalmers J, et al.; ADVANCE Collaborative Group. Effects of a fixed combination of perindopril and indapamide on macrovascular and microvascular outcomes in patients with type 2 diabetes mellitus (the ADVANCE trial): a randomised controlled trial. *Lancet* 2007;370:829–840
- Grossman E, Messerli FH. Management of blood pressure in patients with diabetes. *Am J Hypertens* 2011;24:863–875
- Yusuf S, Teo KK, Pogue J, et al.; ONTARGET Investigators. Telmisartan, ramipril, or both in patients at high risk for vascular events. *N Engl J Med* 2008;358:1547–1559
- Cooper-DeHoff RM, Gong Y, Handberg EM, et al. Tight blood pressure control and cardiovascular outcomes among hypertensive patients with diabetes and coronary artery disease. *JAMA* 2010;304:61–68
- Cushman WC, Evans GW, Byington RP, et al.; ACCORD Study Group. Effects of intensive blood-pressure control in type 2 diabetes mellitus. *N Engl J Med* 2010;362:1575–1585
- Yusuf S, Diener HC, Sacco RL, et al.; PROFESS Study Group. Telmisartan to prevent recurrent stroke and cardiovascular events. *N Engl J Med* 2008;359:1225–1237
- Yusuf S, Teo K, Anderson C, et al.; Telmisartan Randomised Assessment Study in ACE intolerant subjects with cardiovascular Disease (TRANSCEND) Investigators. Effects of the angiotensin-receptor blocker telmisartan on cardiovascular events in high-risk patients intolerant to angiotensin-converting enzyme inhibitors: a randomised controlled trial. *Lancet* 2008;372:1174–1183
- Bangalore S, Kumar S, Lobach I, Messerli FH. Blood pressure targets in subjects with type 2 diabetes mellitus/impaired fasting glucose: observations from traditional and bayesian random-effects meta-analyses of randomized trials. *Circulation* 2011;123:2799–2810
- Reboldi G, Gentile G, Angeli F, Ambrosio G, Mancia G, Verdecchia P. Effects of intensive blood pressure reduction on myocardial infarction and stroke in diabetes: a meta-analysis in 73,913 patients. *J Hypertens* 2011;29:1253–1269
- McBrien K, Rabi DM, Campbell N, et al. Intensive and standard blood pressure targets in

patients with type 2 diabetes mellitus: systematic review and meta-analysis. *Arch Intern Med* 2012;172:1296–1303

36. Port S, Demer L, Jennrich R, Walter D, Garfinkel A. Systolic blood pressure and mortality. *Lancet* 2000;355:175–180

37. Jacobs JM, Stessman J, Ein-Mor E, Bursztyn M. Hypertension and 5-year mortality among 85-year-olds: the Jerusalem Longitudinal Study. *J Am Med Dir Assoc* 2012;13:759.e1–6

38. Rönneback M, Isomaa B, Fagerudd J, et al.; Botnia Study Group. Complex relationship between blood pressure and mortality in type 2 diabetic patients: a follow-up of the Botnia Study. *Hypertension* 2006;47:168–173

39. van Hateren KJ, Landman GW, Kleefstra N, et al. Lower blood pressure associated with higher mortality in elderly diabetic patients (ZODIAC-12). *Age Ageing* 2010;39:603–609

40. Beckett NS, Peters R, Fletcher AE, et al.; HYVET Study Group. Treatment of hypertension in patients 80 years of age or older. *N Engl J Med* 2008;358:1887–1898

41. Warwick J, Falaschetti E, Rockwood K, et al. No evidence that frailty modifies the positive impact of antihypertensive treatment in very elderly people: an investigation of the impact of frailty upon treatment effect in the HYVET study, a double-blind, placebo-controlled study of antihypertensives in people with hypertension aged 80 and over. *BMC Med* 2015;13:78

42. JATOS Study Group. Principal results of the Japanese trial to assess optimal systolic blood pressure in elderly hypertensive patients (JATOS). *Hypertens Res* 2008;31:2115–2127

43. Rakugi H, Ogihara T, Goto Y, Ishii M; JATOS Study Group. Comparison of strict- and mild-blood pressure control in elderly hypertensive patients: a per-protocol analysis of JATOS. *Hypertens Res* 2010;33:1124–1128

44. Gueyffier F, Bulpitt C, Boissel JP, et al.; INDANA Group. Antihypertensive drugs in very old people: a subgroup meta-analysis of randomised controlled trials. *Lancet* 1999;353:793–796

45. Turnbull F, Neal B, Ninomiya T, et al.; Blood Pressure Lowering Treatment Trialists' Collaboration. Effects of different regimens to lower blood pressure on major cardiovascular events in older and younger adults: meta-analysis of randomised trials. *BMJ* 2008;336:1121–1123

46. Emdin CA, Rahimi K, Neal B, Callender T, Perkovic V, Patel A. Blood pressure lowering in type 2 diabetes: a systematic review and meta-analysis. *JAMA* 2015;313:603–615

47. Xie X, Atkins E, Lv J, et al. Effects of intensive blood pressure lowering on cardiovascular and renal outcomes: updated systematic review and meta-analysis. *Lancet* 2016;387:435–443

48. SPRINT Research Group, Wright JT Jr, Williamson JD, Whelton PK, et al. A randomized trial of intensive versus standard blood-pressure control. *N Engl J Med* 2015; 373:2103–2116

49. ACCORDION. Long-term Follow-up of ACCORD Patients. Late-breaking abstract presented at the American Heart Association 2015 Scientific Sessions, 7–11 November 2015, Orlando, FL

50. Coffman TM, Crowley SD. Kidney in hypertension: guyton redux. *Hypertension* 2008;51: 811–816

51. Banach M, Bromfield S, Howard G, et al. Association of systolic blood pressure levels with cardiovascular events and all-cause mortality among older adults taking antihypertensive medication. *Int J Cardiol* 2014;176:219–226

52. Curb JD, Pressel SL, Cutler JA, et al.; Systolic Hypertension in the Elderly Program Cooperative Research Group. Effect of diuretic-based antihypertensive treatment on cardiovascular disease risk in older diabetic patients with isolated systolic hypertension. *JAMA* 1996;276:1886–1892

53. Staessen JA, Fagard R, Thijs L, et al.; The Systolic Hypertension in Europe (Syst-Eur) Trial Investigators. Randomised double-blind comparison of placebo and active treatment for older patients with isolated systolic hypertension. *Lancet* 1997;350:757–764

54. Staessen JA, Fagard R, Thijs L, et al. Subgroup and per-protocol analysis of the randomized European Trial on Isolated Systolic Hypertension in the Elderly. *Arch Intern Med* 1998;158: 1681–1691

55. Tuomilehto J, Rastenyte D, Birkenhäger WH, et al.; Systolic Hypertension in Europe Trial Investigators. Effects of calcium-channel blockade in older patients with diabetes and systolic hypertension. *N Engl J Med* 1999;340:677–684

56. Zhang Y, Zhang X, Liu L, Zanchetti A; FEVER Study Group. Is a systolic blood pressure target <140 mmHg indicated in all hypertensives? Subgroup analyses of findings from the randomized FEVER trial. *Eur Heart J* 2011;32:1500–1508

57. Somes GW, Pahor M, Shorr RI, Cushman WC, Applegate WB. The role of diastolic blood pressure when treating isolated systolic hypertension. *Arch Intern Med* 1999;159:2004–2009

58. Boutitie F, Gueyffier F, Pocock S, Fagard R, Boissel JP; INDANA Project Steering Committee. Individual Data Analysis of Antihypertensive

intervention. J-shaped relationship between blood pressure and mortality in hypertensive patients: new insights from a meta-analysis of individual-patient data. *Ann Intern Med* 2002; 136:438–448

59. Solini A, Penno G, Bonora E, et al.; Renal Insufficiency and Cardiovascular Events Study Group. Age, renal dysfunction, cardiovascular disease, and antihyperglycemic treatment in type 2 diabetes mellitus: findings from the Renal Insufficiency and Cardiovascular Events Italian Multicenter Study. *J Am Geriatr Soc* 2013;61: 1253–1261

60. Inker LA, Okparavero A, Tighiouart H, et al. Midlife blood pressure and late-life GFR and albuminuria: an elderly general population cohort. *Am J Kidney Dis* 2015;66:240–248

61. Wheeler DC, Becker GJ. Summary of KDIGO guideline. What do we really know about management of blood pressure in patients with chronic kidney disease? *Kidney Int* 2013;83:377–383

62. Perkovic V, Ninomiya T, Arima H, et al. Chronic kidney disease, cardiovascular events, and the effects of perindopril-based blood pressure lowering: data from the PROGRESS study. *J Am Soc Nephrol* 2007;18:2766–2772

63. Arguedas JA, Leiva V, Wright JM. Blood pressure targets for hypertension in people with diabetes mellitus. *Cochrane Database Syst Rev* 2013;10:CD008277

64. Guideline development group. Clinical practice guideline on management of patients with diabetes and chronic kidney disease stage 3b or higher (eGFR <45 mL/min). *Nephrol Dial Transplant* 2015;30(Suppl. 2):ii1–ii142

65. Dorresteyn JA, van der Graaf Y, Spiering W, Grobbee DE, Bots ML, Visseren FL; Secondary Manifestations of Arterial Disease Study Group. Relation between blood pressure and vascular events and mortality in patients with manifest vascular disease: J-curve revisited. *Hypertension* 2012;59:14–21

66. Messerli FH, Mancia G, Conti CR, et al. Dogma disputed: can aggressively lowering blood pressure in hypertensive patients with coronary artery disease be dangerous? *Ann Intern Med* 2006;144:884–893

67. Denardo SJ, Gong Y, Nichols WW, et al. Blood pressure and outcomes in very old hypertensive coronary artery disease patients: an INVEST substudy. *Am J Med* 2010;123:719–726

68. Mader SL. Identification and management of orthostatic hypotension in older and medically complex patients. *Expert Rev Cardiovasc Ther* 2012;10:387–395
